# Supplementary material
Source: Springer Nature journal article supplement (https://www.springermedizin.de/resource/supplementary/13054_2011_550_MOESM2_ESM.pdf/9708788)

## A) Overall Mortality

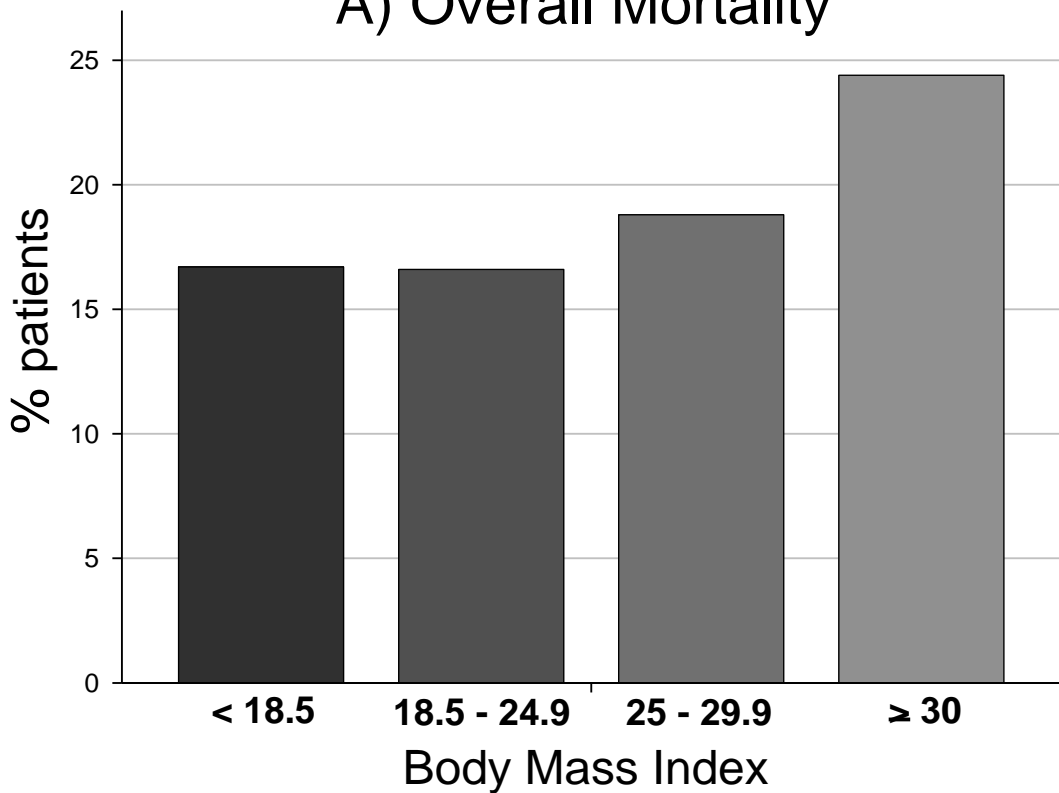

## B) Mortality from Hemorrhagic Shock

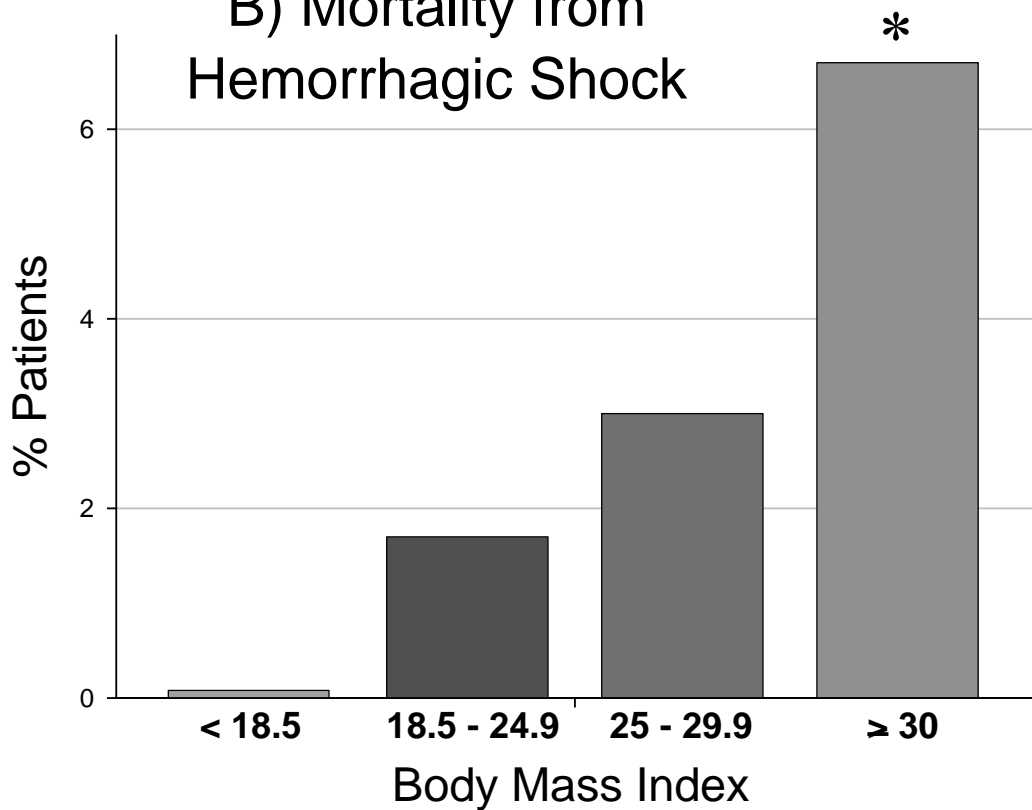

Supplement: MOESM2 [file 9708788]
